# Supplementary material for: Novel heterometal-organic complexes as first single source precursors for up-converting NaY(Ln)F4(Ln = Yb, Er, Tm) nanomaterials
Source: Royal Society of Chemistry journal article supplement (doi:10.1039/c1dt11070e), 2011-12-03
Supplement: c1dt11070e.pdf [file c1dt11070e.pdf]

## Electronic Supplementary Information

### **Novel heterometal-organic complexes as first single source precursors for up- converting NaY(Ln)F<sub>4</sub> (Ln = Yb, Er, Tm) nanomaterials**

Shashank Mishra,<sup>\*a,b</sup> Gilles Ledoux,<sup>b</sup> Erwann Jeanneau,<sup>c</sup> Stéphane Daniele<sup>\*a</sup>

and Marie-France Joubert<sup>\*b</sup>

<sup>a</sup>University of Lyon 1, IRCELYON, 2 Avenue A. Einstein, 69626 Villeurbanne, France.

Fax: 33 472445399; Tel: 33 472445329; E-mail: [mishrashashank74@rediffmail.com](mailto:mishrashashank74@rediffmail.com)

<sup>b</sup>University of Lyon 1, Laboratoire de Physico Chimie des Matériaux Luminescent, 10 rue A.

M. Ampère, 69622 Villeurbanne, France.

<sup>c</sup>University of Lyon 1, Centre de Diffractométrie, 69622 Villeurbanne, France.

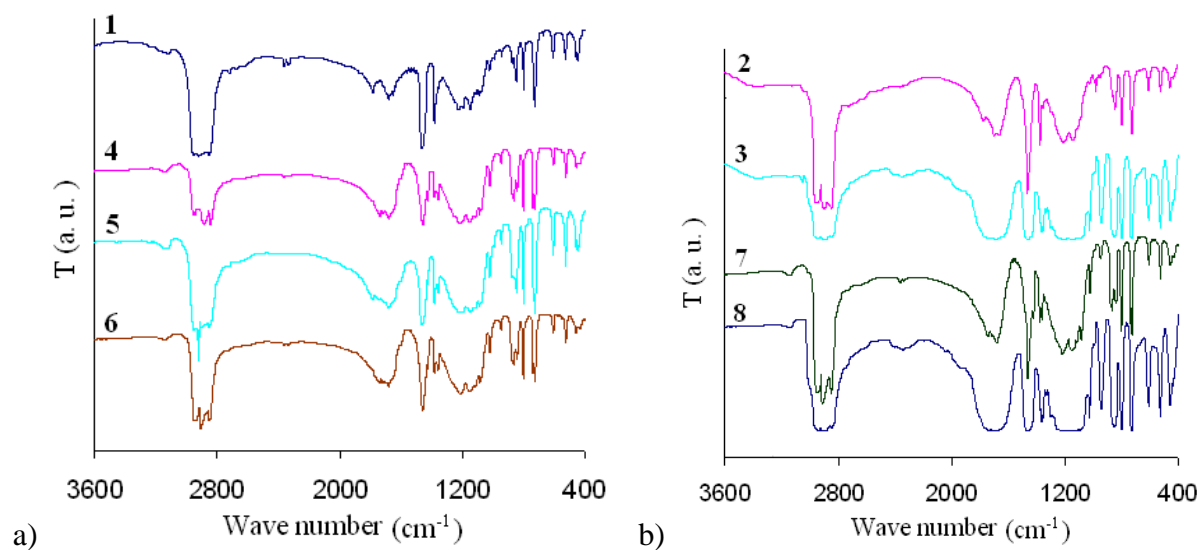

**Fig. S1** FT-IR spectra of (a) diglyme complexes **1** & **4-6**, and (b) triglyme (**2**) and tetraglyme complexes (**3, 7, 8**).

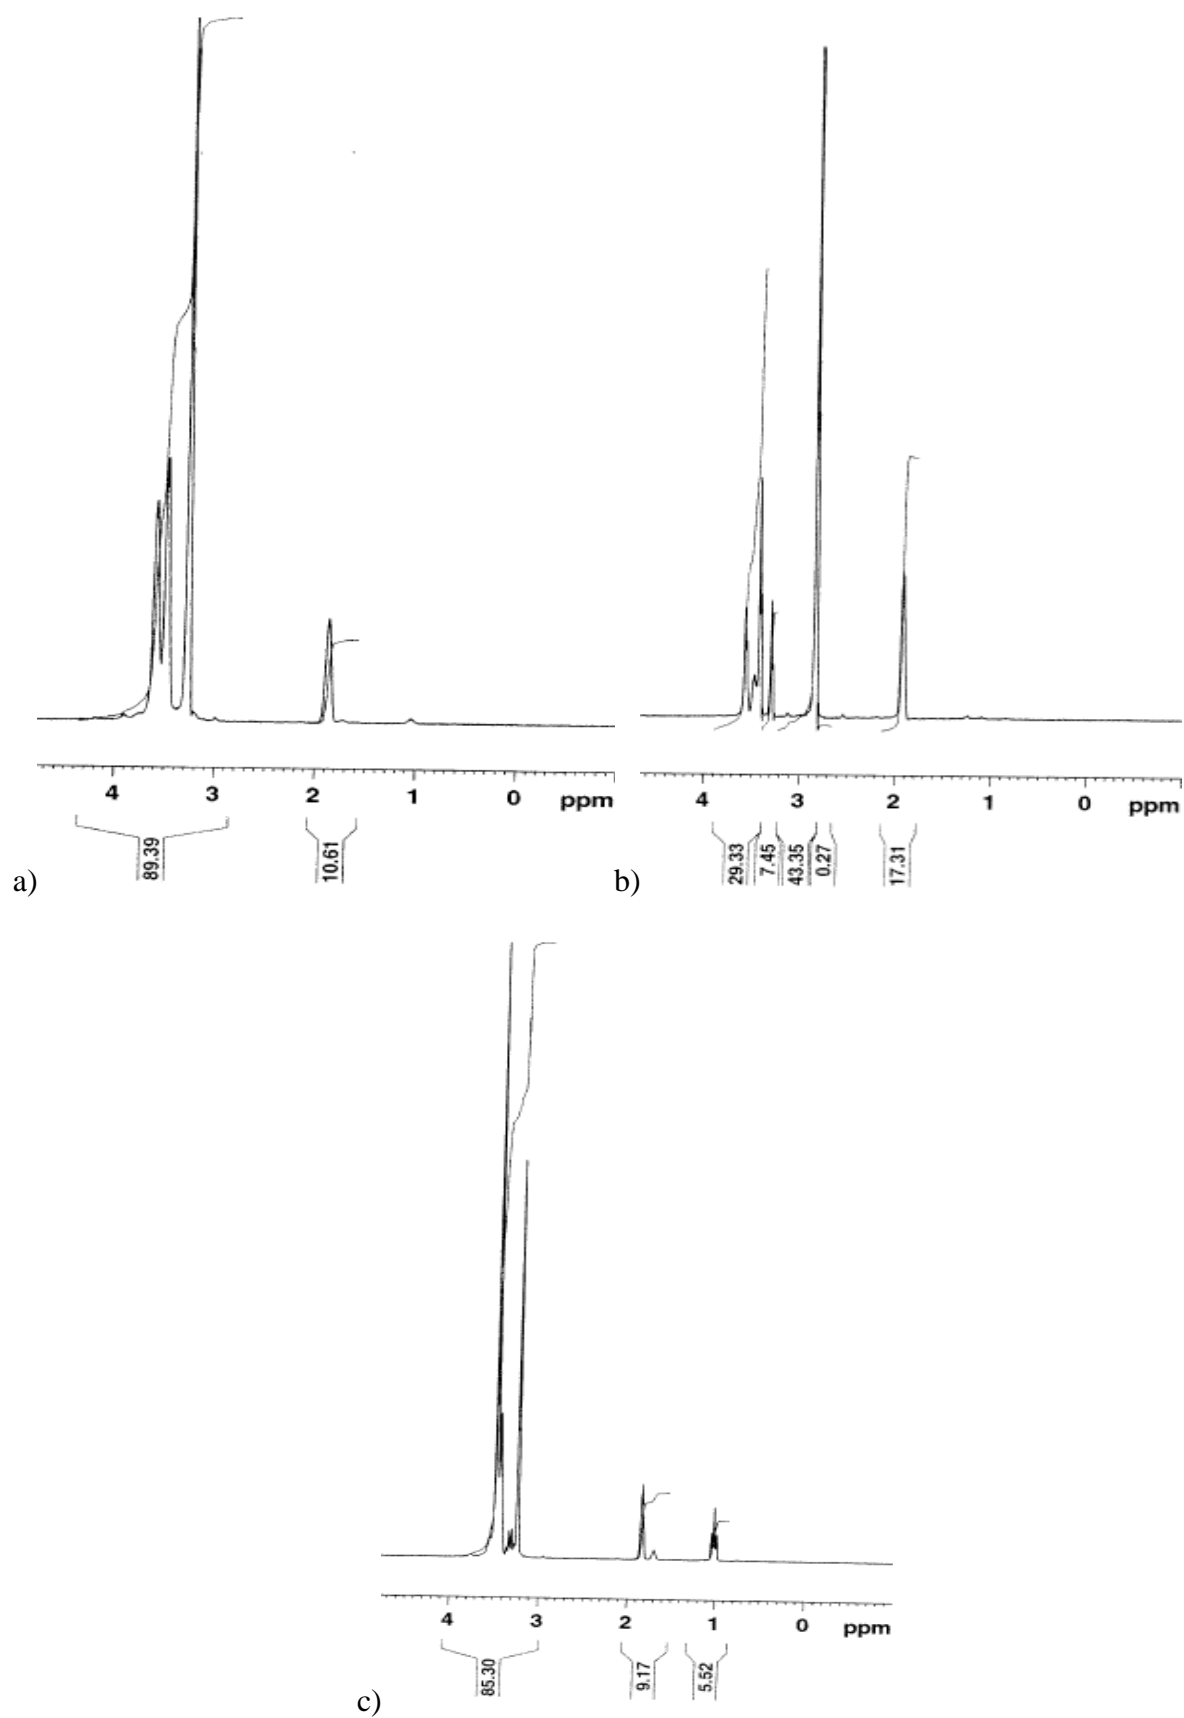

**Fig. S2** <sup>1</sup>H NMR spectra of **1** (a), **2** (b) and **3** (c).

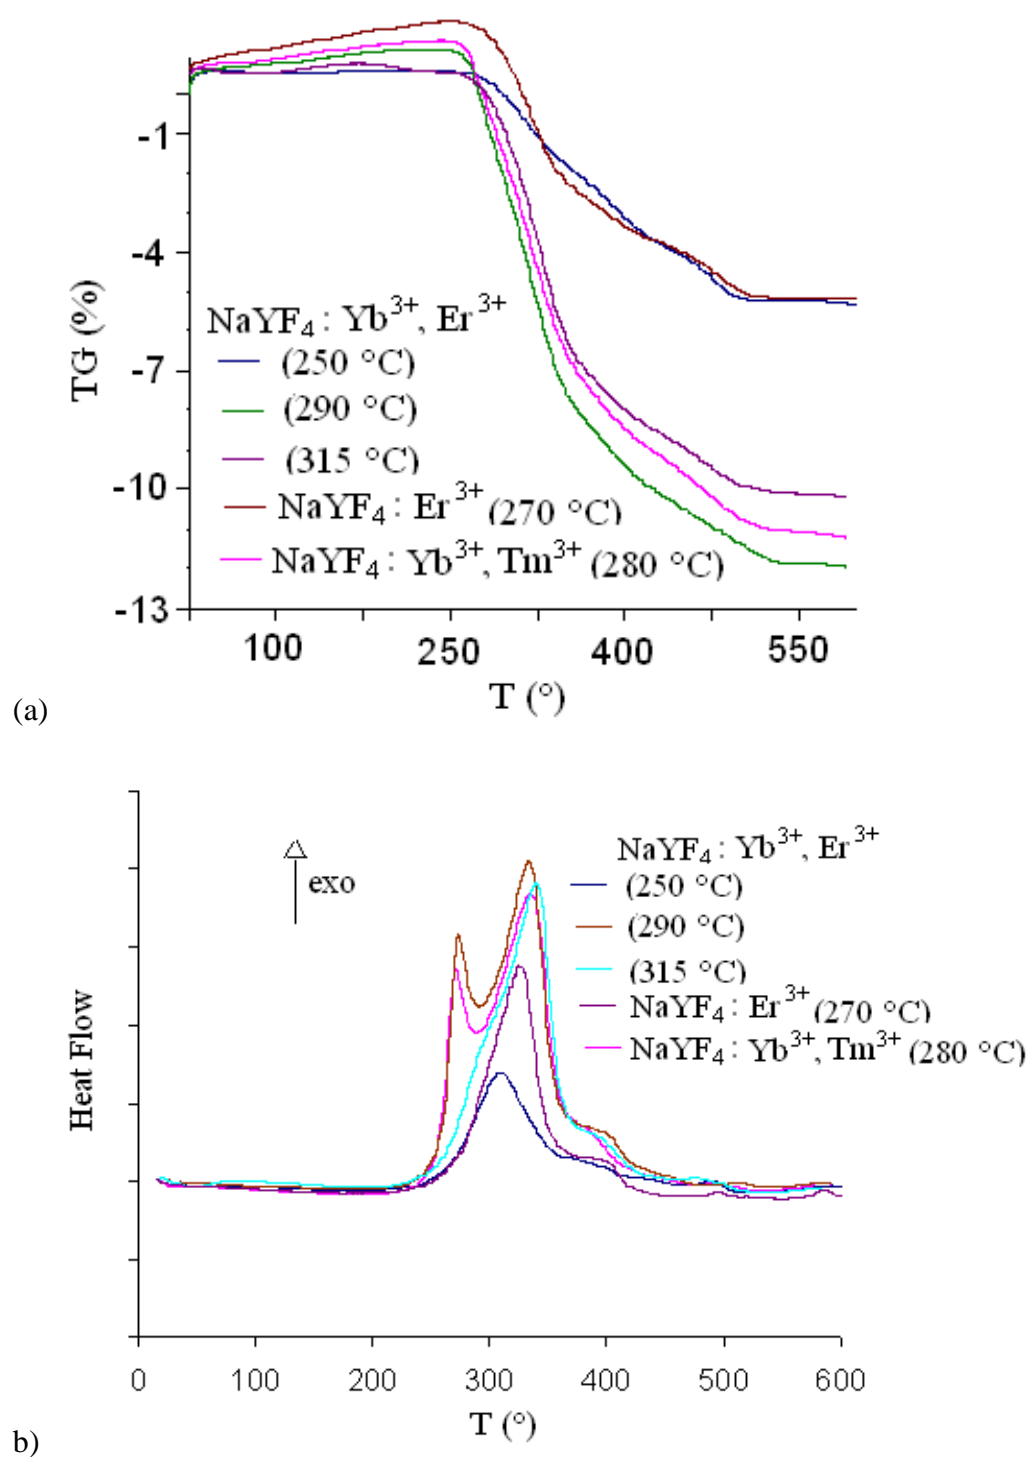

**Fig. S3** TGA (a) and DTA (b) of NaYF<sub>4</sub>: Yb<sup>3+</sup>, Er<sup>3+</sup>/Tm<sup>3+</sup> NCs obtained at different temperature.

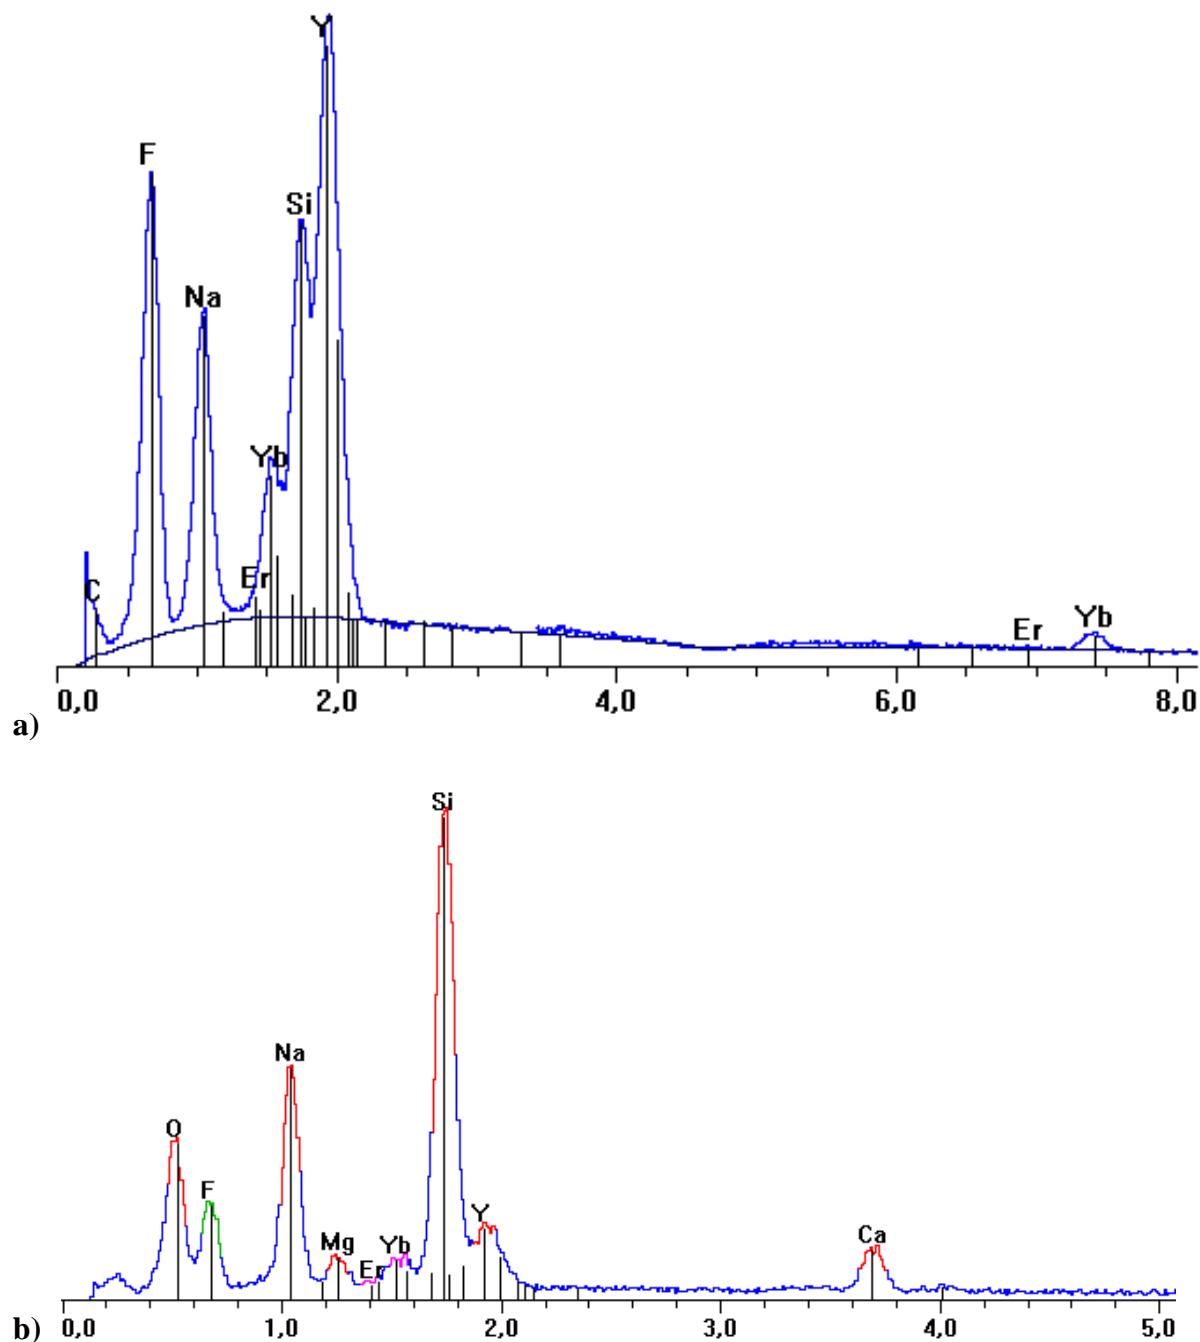

**Fig. S4** EDX analysis of the thin films obtained by spin-coating of the diglyme precursors **1**, **4** and **6**. Above: NaYF<sub>4</sub>: Yb<sup>3+</sup>, Er<sup>3+</sup> films on Si wafer & calcined at 400 °C under nitrogen. Below: thin films consisting of the NaF and Y(Ln)OF phases on glass substrate (calcined at 400 °C in air).

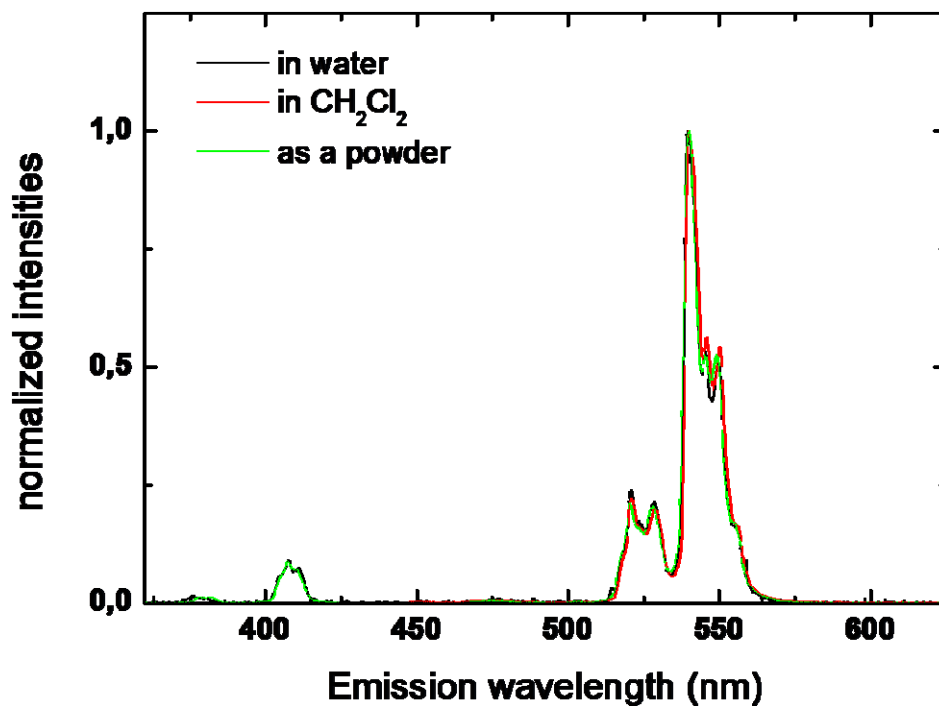

Fig. S5 Emission spectra of NaYF<sub>4</sub>: Yb<sup>3+</sup>, Er<sup>3+</sup> NCs when taken in solid or solution states.

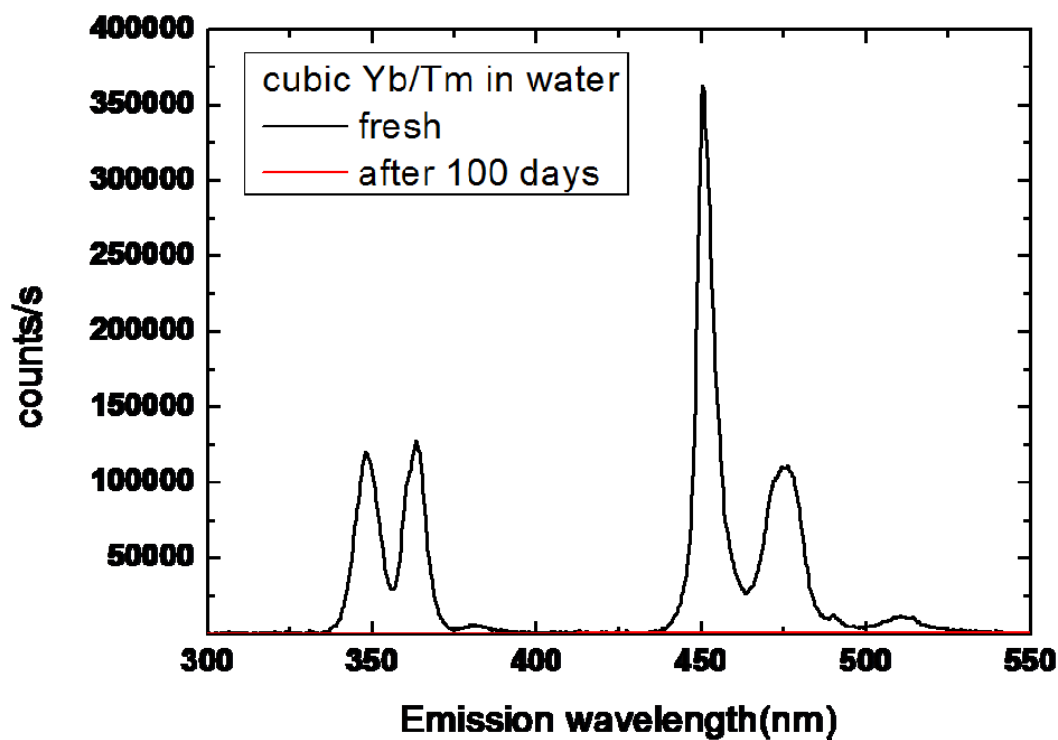

Fig. S6 Effect of aging of NaYF<sub>4</sub>: 20% Yb<sup>3+</sup>, 2% Tm<sup>3+</sup> NCs.

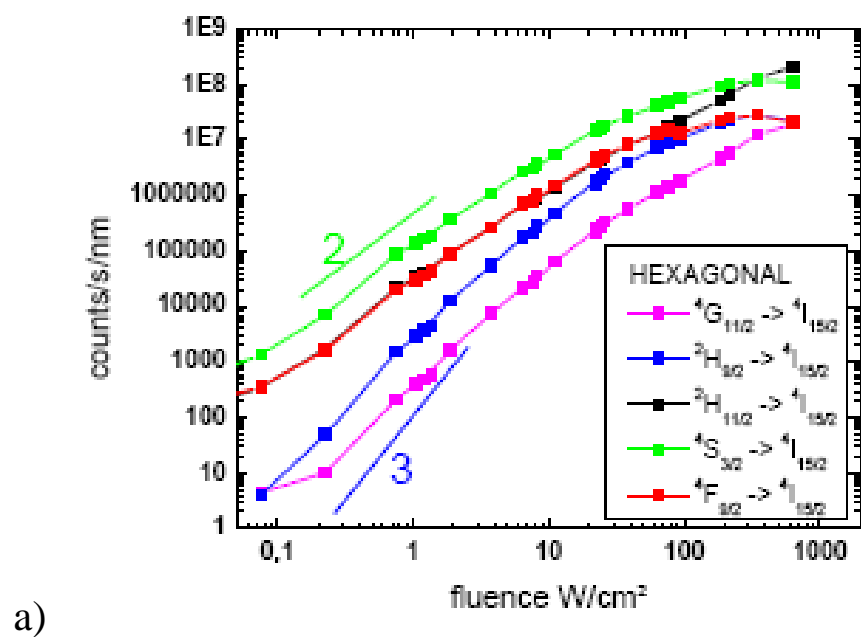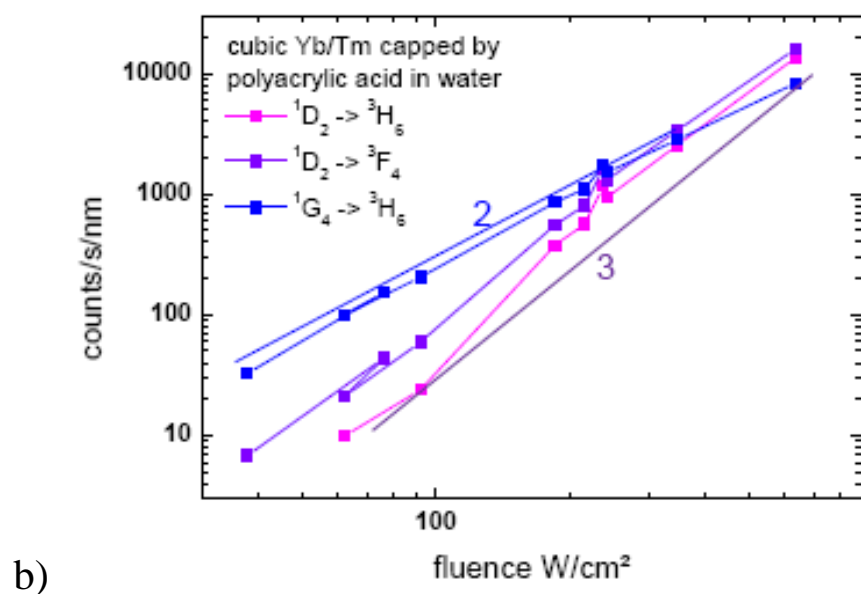

**Fig. S7:** Evolution of the intensity of the difference bands with the excitation power: (a) hexagonal phase of NaYF<sub>4</sub>: Yb<sup>3+</sup>, Ln<sup>3+</sup> NCs taken as a solid powder, and b) the cubic phase of NaYF<sub>4</sub>: Yb<sup>3+</sup>, Tm<sup>3+</sup> NCs taken in water.
